# Supplementary material for: Zinc ion flux during mammalian sperm capacitation
Source: PubMed Central journal article supplement (PMC5970269; doi:10.1038/s41467-018-04523-y), 2018-05-25
Supplement: 41467_2018_4523_MOESM1_ESM.pdf [file 41467_2018_4523_MOESM1_ESM.pdf]

# Supplementary Information

## Gating approach

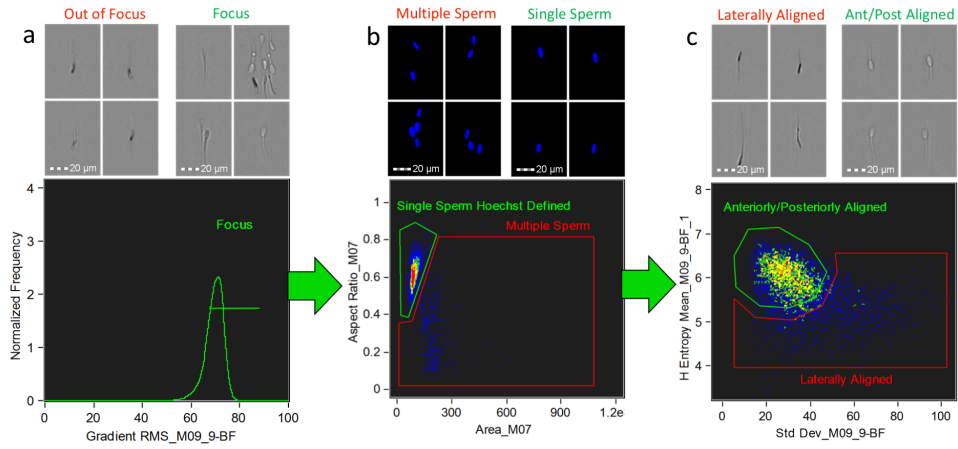

## Masking approach

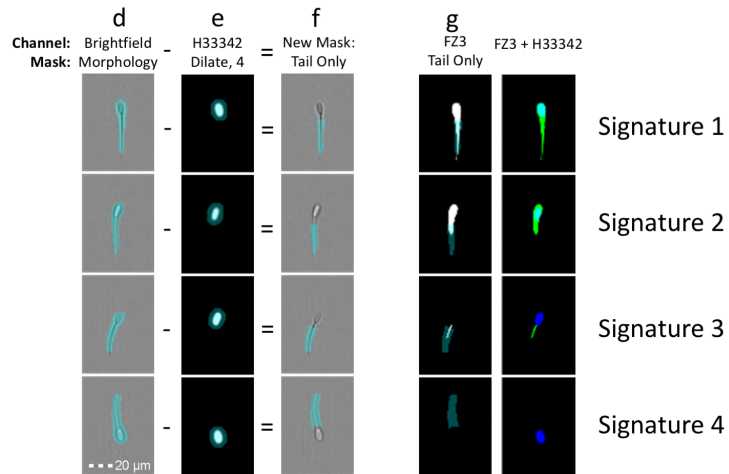

## Gating and masking approach combined

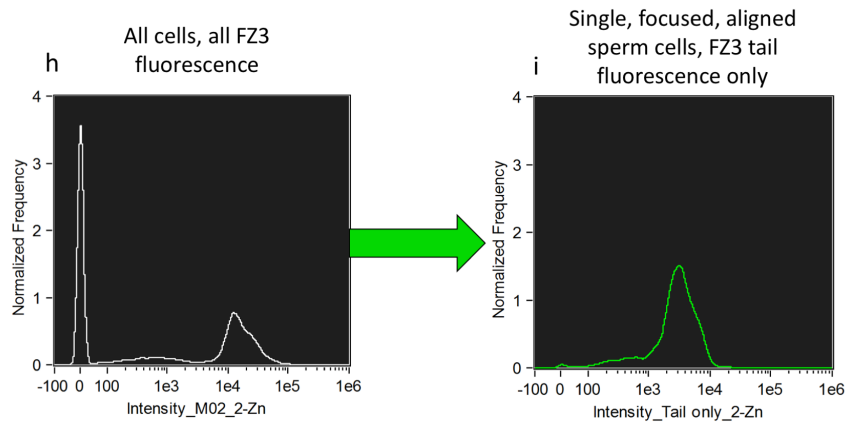

### Supplementary Figure 1: Gating and masking approach.

**a**, Initial events collected from FlowSight data acquisition were gated for cells in focus as a function of brightfield gradient RMS, (a calculation of image crispness). **b**, Events in focus are further gated to analyze only single spermatozoa, plotted as H33342 fluorescence area by aspect ratio. **c**, To differentiate and gate out laterally aligned spermatozoa, a plot of brightfield standard deviation by brightfield H entropy mean is used. **d-g**, Mask (cyan) defines the region analyzed; fluorescence color removed to create greater contrast. **d**, Morphology mask of the brightfield **e**, subtracting a 4 pixel dilation of H33342 **f**, resulting in mask analyzing FZ3 fluorescence in the sperm tail only. **g**, Resulting gating and masking strategy ensures prudent data analysis not possible with conventional flow cytometry (all scale bars: 20  $\mu\text{m}$ ).

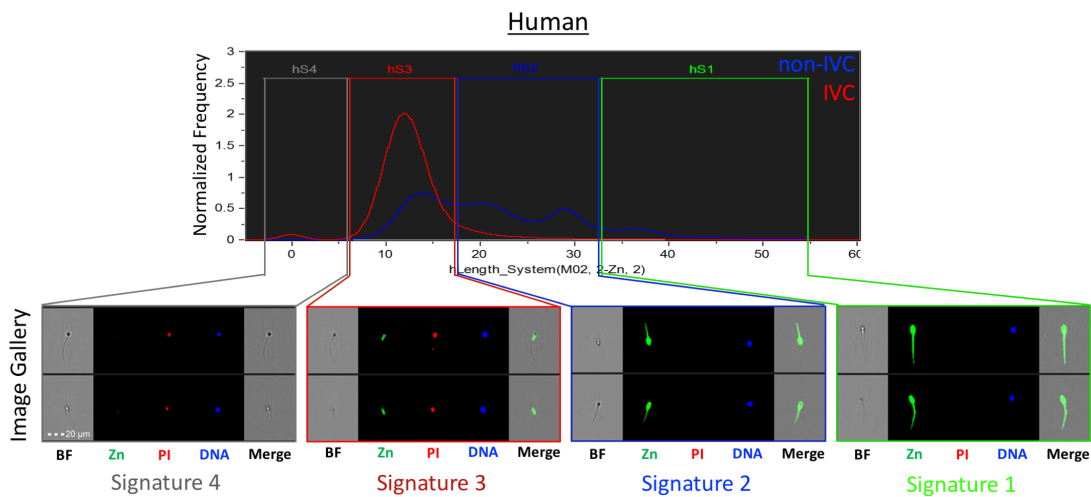

### Supplementary Figure 2: Zinc signature of human spermatozoa after IVC.

Human spermatozoa undergo shift similar to porcine spermatozoa, towards signature 3 after 4 hours of IVC (histogram, red) compared to neat, non-IVC spermatozoa (histogram blue; scale bar: 20  $\mu\text{m}$ ).

## IVC proteasome inhibitor replicate

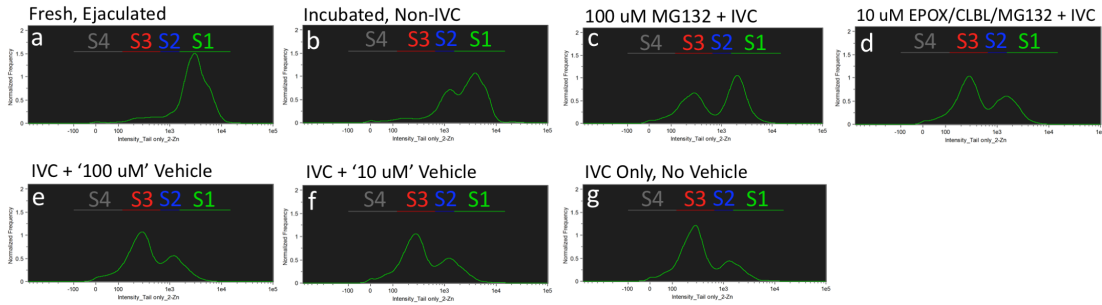

## TPEN Controls

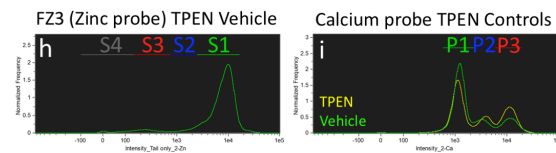

## Sequential sperm extraction treatment

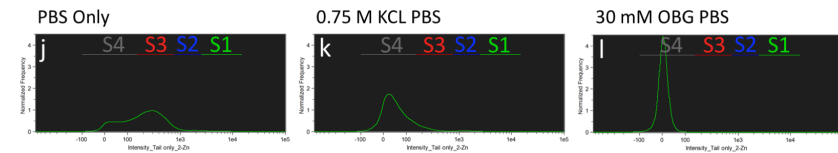

## Time lapse

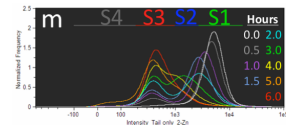

**Supplementary Figure 3: Replicate, controls, and sequential extraction analysis.** **a-g**, Second biological replicate of IVC proteasomal inhibitor treatments. **h**, TPEN FZ3 zinc probe vehicle treatment; vehicle did not shift zinc signature compared to no vehicle or TPEN treatment. **i**, Fluo4 calcium probe TPEN and vehicle control to show no decrease in TPEN-treated calcium levels. **j-l**, Sequential extraction of fresh, ejaculated spermatozoa. **j**, Most Zn-induced FZ3 fluorescence was lost in the first step (PBS wash), suggesting the bulk of Zn ions is freely available and can be depleted by a simple diffusion into the treatment buffer, observed by shift to signature 3. **k**, Increasing the ionic strength with 0.75 M KCl treatment resulted in further depletion of  $Zn^{2+}$ , after which the zinc signal was observed solely in sperm tail midpiece, where Zn metalloproteinases/Zn-dependent structural proteins are present within mitochondria, and  $Zn^{2+}$  is thus held by electrostatic forces. This agrees with further shift of sperm from signature 3 to signature 4. **l**, Introduction of non-ionic detergent (30 mM OBG) in the treatment buffer in the final step resulted in release of all remaining Zn, observed as complete shift of remaining signature 3 spermatozoa to signature 4 (complete loss of Zn-induced fluorescence). **m**, Time lapse Zn Signature cytometry every 30 minutes between 0-2 hours, then every hour until 6 hours; color code of time points located in figure legend.

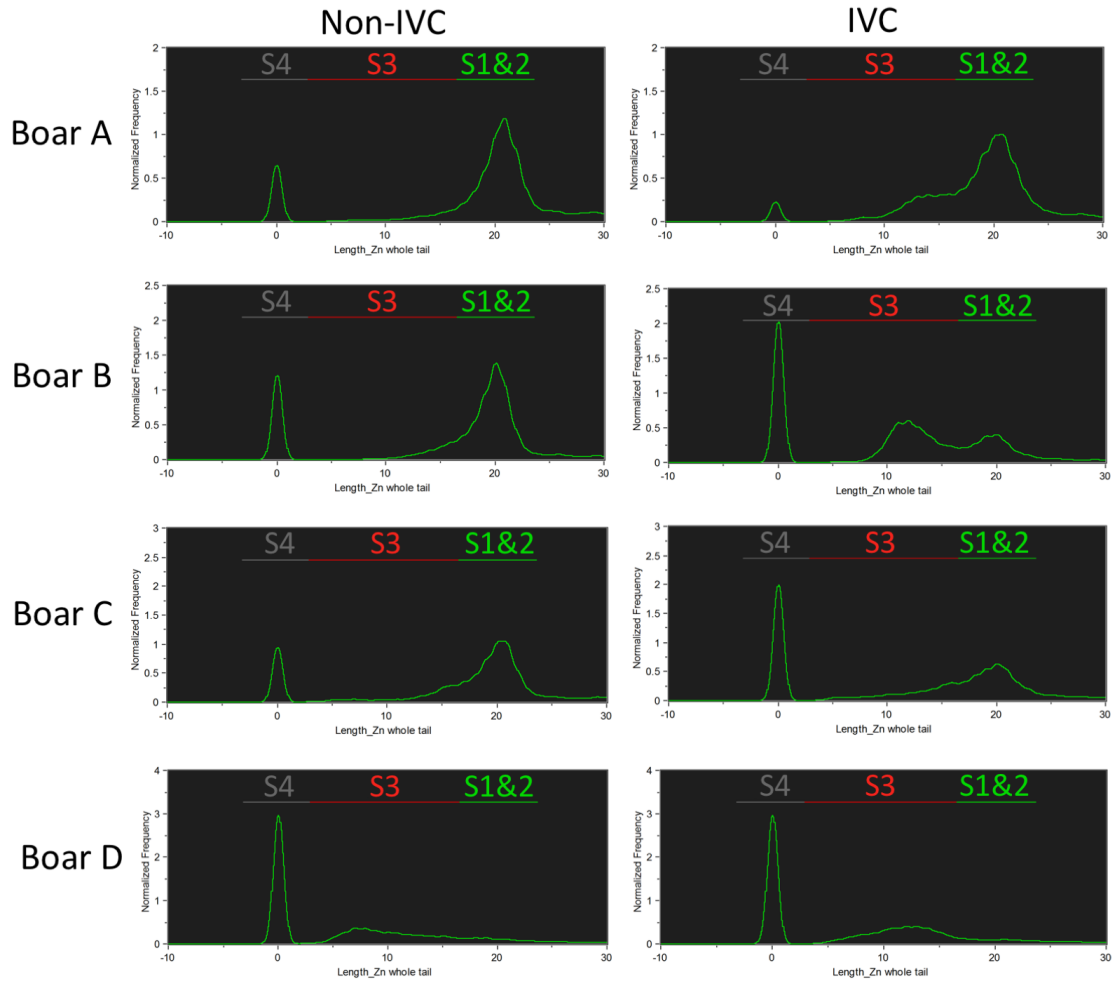

**Supplementary Figure 4: Zinc signature fertility trial histograms.**  
**a,** Zinc signature histograms of four boars with known high or low fertility, before and after IVC.

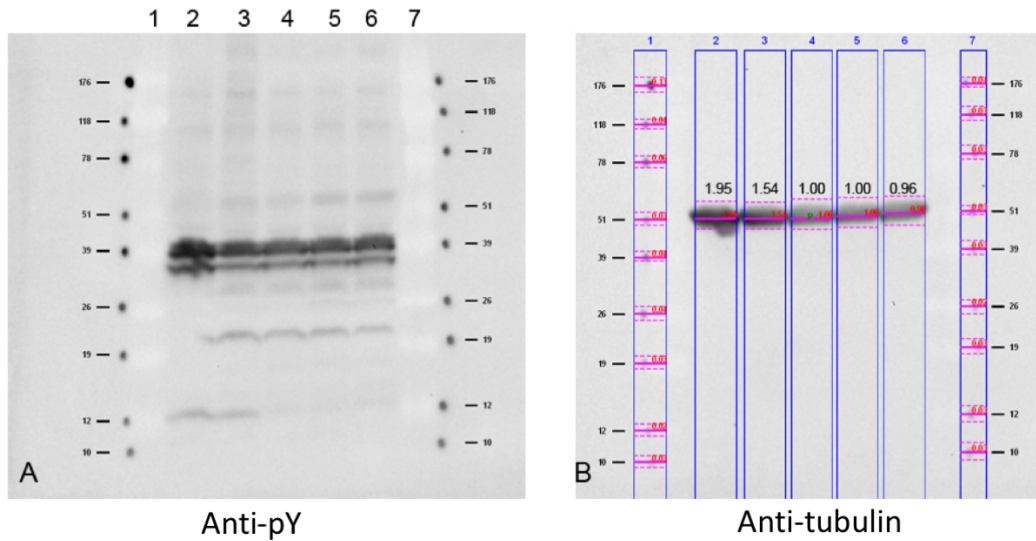

**Supplementary Figure 5: Capacitation status confirmation under varied IVC conditions.** The density of band migrating between 19-26 kDa markers (panel a) remained unchanged relative to loading control (panel b) in the extracts of spermatozoa capacitated with high vs. low sodium bicarbonate and pyruvate. **a**, Anti-phosphotyrosine Western blot of sperm extracts from treatments in the following lanes: 1) marker; 2) ejaculated, non-IVC; 3) experimental IVC conditions (2 mM sodium bicarbonate, 5 mM pyruvate); 4) comparison IVC (15 mM sodium bicarbonate, 0.2 mM pyruvate); 5) comparison IVC (15 mM sodium bicarbonate, 5 mM pyruvate). **b**, Loading control anti-tubulin Western blot with quantification for normalization.

**Supplementary Table 1: Boar fertility trial records.**

| Boar   | Farrowing Rate | Average Litter Size | Services (n) |
|--------|----------------|---------------------|--------------|
| Boar A | 90.5%          | 10.03               | 42           |
| Boar B | 89.5%          | 9.52                | 38           |
| Boar C | 65.2%          | 7.40                | 23           |
| Boar D | 57.1%          | 7.17                | 21           |
